# Supplementary material
Source: PubMed Central journal article supplement (PMC7450538)
Supplement: NIHMS1552327-supplement-Appendix.pdf [file NIHMS1552327-supplement-Appendix.pdf]

| HISTORIA CLINICA PERINATAL - CLAP - OPS/OMS |  |  |  | FECHA DE NACIMIENTO |         | RAZA                           |                               | ALFA BETA                |          | ESTUDIOS |        | ESTADO CIVIL    |          | CONTROL PRENATAL EN |  |  |
|---------------------------------------------|--|--|--|---------------------|---------|--------------------------------|-------------------------------|--------------------------|----------|----------|--------|-----------------|----------|---------------------|--|--|
| NOMBRE                                      |  |  |  | dia                 | mes     | año                            | <input type="radio"/> blanca  | <input type="radio"/> si | ninguno  | primaria | casada | unión estable   | PARTO EN |                     |  |  |
| DOMICILIO                                   |  |  |  | EDAD (años)         |         | <input type="radio"/> indigena | <input type="radio"/> mestiza | secund.                  | univers. | soltera  | otro   | NUMERO IDENTID. |          |                     |  |  |
| LOCALIDAD                                   |  |  |  | < de 16             | > de 40 | <input type="radio"/> negra    | <input type="radio"/> otra    | años en el mayor nivel   |          |          |        |                 |          |                     |  |  |

| ANTECEDENTES              |                                |                                    |                                              | OBSTETRICOS           |        |                        |  | FIN EMBARAZO ANTERIOR |  |                 |  |                                                                                                                                                                                                                   |  |  |  |
|---------------------------|--------------------------------|------------------------------------|----------------------------------------------|-----------------------|--------|------------------------|--|-----------------------|--|-----------------|--|-------------------------------------------------------------------------------------------------------------------------------------------------------------------------------------------------------------------|--|--|--|
| FAMILIARES                |                                | PERSONALES                         |                                              | gestas previas        |        | abortos                |  | vaginales             |  | nacidos vivos   |  | viven                                                                                                                                                                                                             |  |  |  |
| <input type="radio"/> no  | <input type="radio"/> si       | <input type="radio"/> no           | <input type="radio"/> si                     | ULTIMO PREVIO         |        | 3 espont. consecutivos |  | partos                |  | nacidos muertos |  | muertos 1º sem.                                                                                                                                                                                                   |  |  |  |
| <input type="radio"/> TBC | <input type="radio"/> diabetes | <input type="radio"/> hipertensión | <input type="radio"/> preeclampsia eclampsia | <2500g                | >4500g | cesáreas               |  | cesáreas              |  | después 1º sem. |  | EMBARAZO PLANEADO si <input type="radio"/> no <input type="radio"/>                                                                                                                                               |  |  |  |
|                           |                                |                                    |                                              | preclampsia-eclampsia |        |                        |  |                       |  |                 |  | FRACASO METODO ANTICONCEP. <input type="radio"/> no usaba <input type="radio"/> barrera <input type="radio"/> DIU <input type="radio"/> píldora depo <input type="radio"/> hormonal <input type="radio"/> natural |  |  |  |

| GESTACION ACTUAL |  |            |  | EG CONFIABLE por FUM |  |                |  | MOVIM. FETALES   |  |                            |  | CIGARRILLOS POR DIA  |  |           |  | ALCOHOL DROGAS                 |  |                                  |  | ANTITETANICA |  |         |  | ANTIRUBEOLA |  |    |  | EX. NORMAL |  |  |  |
|------------------|--|------------|--|----------------------|--|----------------|--|------------------|--|----------------------------|--|----------------------|--|-----------|--|--------------------------------|--|----------------------------------|--|--------------|--|---------|--|-------------|--|----|--|------------|--|--|--|
| PESO ANTERIOR    |  | TALLA (cm) |  | Eco <20 s.           |  | desde          |  | 0= no fuma       |  | no                         |  | si                   |  | vigente   |  | si                             |  | no                               |  | previa       |  | no sabe |  | si          |  | no |  |            |  |  |  |
|                  |  | 1          |  | si                   |  |                |  |                  |  | Hb <20 sem                 |  | Fe/FOLATOS indicados |  | Hb 20 sem |  | ESTREPTOCOCO B 35 - 37 semanas |  | PELVIANA intento versión externa |  |              |  |         |  |             |  |    |  |            |  |  |  |
| BACTERIURIA      |  | GRUPO Rh   |  | PAPANICOLAOU         |  | VIH solicitado |  | VDRL/RPR <20 sem |  | SIFILIS confirmada por FTA |  | VDRL/RPR 20 sem      |  | Fe        |  | Folatos                        |  |                                  |  |              |  |         |  |             |  |    |  |            |  |  |  |

|   | dia | mes | edad gest. | peso | PA | altura uterina | presen tación | latidos fetales | signos de alarma, exámenes, tratamientos |  |  |  | próxima cita |
|---|-----|-----|------------|------|----|----------------|---------------|-----------------|------------------------------------------|--|--|--|--------------|
| 1 |     |     |            |      |    |                |               |                 |                                          |  |  |  |              |
| 2 |     |     |            |      |    |                |               |                 |                                          |  |  |  |              |
| 3 |     |     |            |      |    |                |               |                 |                                          |  |  |  |              |
| 4 |     |     |            |      |    |                |               |                 |                                          |  |  |  |              |
| 5 |     |     |            |      |    |                |               |                 |                                          |  |  |  |              |
| 6 |     |     |            |      |    |                |               |                 |                                          |  |  |  |              |
| 7 |     |     |            |      |    |                |               |                 |                                          |  |  |  |              |

| PARTO            |  | ABORTO |  | CONSULTAS PRENATALES |  | HOSPITALIZ en EMBARAZO |  | CORTICOIDES ANTENATALES |  | INICIO        |  | RUPTURA MEMBRANAS ANTEPARTO |  | EG sem. I     |  | Tiempo hasta el parto |  | EDAD GEST. al parto |  | PRESENTACION |  |            |  |
|------------------|--|--------|--|----------------------|--|------------------------|--|-------------------------|--|---------------|--|-----------------------------|--|---------------|--|-----------------------|--|---------------------|--|--------------|--|------------|--|
| FECHA DE INGRESO |  | CARNÉ  |  | total                |  | días                   |  | CICLO UNICO             |  | espontáneo    |  | inducido                    |  | cesar. elect. |  | <37 sem               |  | 18 hs.              |  | por FUM      |  | cefálica   |  |
| dia mes año      |  | si no  |  |                      |  |                        |  | completo                |  | inducido      |  | si no                       |  | si no         |  | si no                 |  | semanas             |  | por Eco.     |  | pelviana   |  |
| dia mes año      |  | si no  |  |                      |  |                        |  | incompl.                |  | cesar. elect. |  | si no                       |  | si no         |  | si no                 |  | días                |  | por Eco.     |  | transversa |  |

| TRABAJO DE PARTO |     |          |          |              |            |        |            |       |  | ENFERMEDADES   |  |  |  |  |                 |  |  |  |  |                       |  |  |  |  |              |  |  |  |  |                           |  |  |  |  |                 |  |  |  |  |          |  |  |  |  |                  |  |  |  |  |
|------------------|-----|----------|----------|--------------|------------|--------|------------|-------|--|----------------|--|--|--|--|-----------------|--|--|--|--|-----------------------|--|--|--|--|--------------|--|--|--|--|---------------------------|--|--|--|--|-----------------|--|--|--|--|----------|--|--|--|--|------------------|--|--|--|--|
| hora             | min | COMPANIA | POSICION | Contr. / 10' | DILATACION | ALTURA | FCF / DIPS | NOTAS |  | ninguna        |  |  |  |  | HTA previa      |  |  |  |  | HTA inducida          |  |  |  |  | preeclampsia |  |  |  |  | eclampsia                 |  |  |  |  | cardiop/ nefrop |  |  |  |  | diabetes |  |  |  |  | otra cond. grave |  |  |  |  |
|                  |     |          |          |              |            |        |            |       |  | corioamionitis |  |  |  |  | infec. urinaria |  |  |  |  | amenaza parto preter. |  |  |  |  | R.C.I.U.     |  |  |  |  | rotura prem. de membranas |  |  |  |  | HEMORRAGIA      |  |  |  |  |          |  |  |  |  |                  |  |  |  |  |

| NACIMIENTO |  | VIVO  |  | hora |  | min |  | dia |  | mes |  | año |  | MULTIPLE |  | orden |  | fetos |  | espont. |  | cesárea |  | otra |  | INDICACION PRINCIPAL DE INDUCCION O PARTO OPERATORIO |  |
|------------|--|-------|--|------|--|-----|--|-----|--|-----|--|-----|--|----------|--|-------|--|-------|--|---------|--|---------|--|------|--|------------------------------------------------------|--|
| anteparto  |  | parto |  |      |  |     |  |     |  |     |  |     |  | 0=único  |  |       |  |       |  | forceps |  | vacuum  |  |      |  | INDUC. OPER.                                         |  |

| ACOMPANANTE |  | POSICION PARTO |  | EPISTOMIA |  | DESGARRO |  | OCITOCICOS EN ALUMBRAMIENTO |  | PLACENTA COMPLETA |  | LIGADURA CORDON |  | MgSO4 |  | ocitocina |  | antibiot. |  | analgesia |  | anest. regional |  | anest. gral |  | transfusión |  |
|-------------|--|----------------|--|-----------|--|----------|--|-----------------------------|--|-------------------|--|-----------------|--|-------|--|-----------|--|-----------|--|-----------|--|-----------------|--|-------------|--|-------------|--|
| pareja      |  | sentada        |  | no        |  | Grado    |  | ocitocina                   |  | si no             |  | precoz (<30s)   |  | no    |  | no        |  | no        |  | no        |  | no              |  | no          |  | no          |  |
| familiar    |  | cucillas       |  | si        |  | 1 2 3 4  |  | otro                        |  | si no             |  | tardía (>30s)   |  | si    |  | si        |  | si        |  | si        |  | si              |  | si          |  | si          |  |

| RECIENTE NACIDO     |  |               |  | PER. CEFALICO |  |         |  | EG CONFIABLE |  |                          |  | PESO E.G. |  |         |  | APGAR                  |  |          |  | FALLECE en SALA de PARTO |  |            |  | ATENDIO |  |               |  |         |  |        |  |
|---------------------|--|---------------|--|---------------|--|---------|--|--------------|--|--------------------------|--|-----------|--|---------|--|------------------------|--|----------|--|--------------------------|--|------------|--|---------|--|---------------|--|---------|--|--------|--|
| SEXO                |  | PESO AL NACER |  | cm            |  | sem.    |  | adec.        |  | 1º min.                  |  | 5º        |  | máscara |  | si                     |  | REFERIDO |  | medico                   |  | enf./obst. |  | auxil.  |  | estud./empir. |  | otro    |  | Nombre |  |
| f m                 |  | g             |  | cm            |  | FUM ECO |  | peq.         |  | 1º min.                  |  | 2º        |  | si no   |  | alój.conj. hosp. hosp. |  | PARTO    |  | PARTO                    |  | PARTO      |  | PARTO   |  | PARTO         |  | PARTO   |  |        |  |
| DEFECTOS CONGENITOS |  | ENFERMEDADES  |  | LONGITUD      |  | FUM ECO |  | gde.         |  | TAMIZAJE NEONATAL NORMAL |  | VDRL      |  | TSH     |  | Hbpatia                |  | Meconio  |  | Boca arriba              |  | pulsos     |  | PA      |  | invol.        |  | loquios |  |        |  |

| EGRESO RN          |  |                             |  | EGRESO MATERNO         |  |                             |  |
|--------------------|--|-----------------------------|--|------------------------|--|-----------------------------|--|
| dia mes            |  | vivo después de traslado    |  | dia mes                |  | viva después de traslado    |  |
| fallece            |  | fallece después de traslado |  | fallece                |  | fallece después de traslado |  |
| EDAD               |  | LACTANCIA                   |  | ANTIRUBEOLA POST PARTO |  | ANTICONCEPCION              |  |
| <1 día             |  | exclusiva                   |  | no                     |  | barrera                     |  |
| PESO AL EGRESO (g) |  | parcial                     |  | si                     |  | ligadura tubaria            |  |
|                    |  | fórmula                     |  | referida               |  | natural                     |  |
| NUMERO IDENTID.    |  | Nombre Recién Nacido        |  | Responsable            |  | Responsable                 |  |

**1 Completar sólo para partos vaginales (luego del parto)**

|                                                                                                                                     |                                                                                                                                |                                                                                                                  |                                                                                              |
|-------------------------------------------------------------------------------------------------------------------------------------|--------------------------------------------------------------------------------------------------------------------------------|------------------------------------------------------------------------------------------------------------------|----------------------------------------------------------------------------------------------|
| <b>Ocitocina para conducción del trabajo de parto</b> (hasta el nacimiento)                                                         |                                                                                                                                | <b>Uterotónicos para manejo activo del alumbramiento</b> (desde el nacimiento hasta la expulsión de la placenta) |                                                                                              |
| <input type="radio"/> No se usó                                                                                                     | <input type="radio"/> Intramuscular                                                                                            | <input type="radio"/> Ninguna                                                                                    | <input type="radio"/> Ocitocina                                                              |
| <input type="radio"/> Intravenosa                                                                                                   |                                                                                                                                | <input type="radio"/> Otros                                                                                      |                                                                                              |
| <b>Uterotónicos en el Post Parto inmediato</b> (desde la expulsión de la placenta hasta la salida de la mujer de la sala de partos) |                                                                                                                                | <b>Si se usó ocitocina:</b>                                                                                      |                                                                                              |
| <input type="radio"/> No se usaron                                                                                                  |                                                                                                                                | Vía de administración                                                                                            |                                                                                              |
| <input type="radio"/> Ocitocina                                                                                                     |                                                                                                                                | <input type="radio"/> Intramuscular                                                                              |                                                                                              |
| <input type="radio"/> Otros                                                                                                         |                                                                                                                                | <input type="radio"/> Intravenosa                                                                                |                                                                                              |
| <b>Episiotomía</b>                                                                                                                  | <b>Desgarro</b>                                                                                                                | <b>Sutura por episiotomía o desgarro perineal</b>                                                                | <b>Placenta retenida</b>                                                                     |
| <input type="radio"/> no <input type="radio"/> si                                                                                   | Grado <input type="radio"/> no <input type="radio"/> 1 <input type="radio"/> 2 <input type="radio"/> 3 <input type="radio"/> 4 | <input type="radio"/> no <input type="radio"/> si                                                                | <input type="radio"/> no <input type="radio"/> extracción manual <input type="radio"/> otros |

**2 Completar para todos los partos (al egreso hospitalario materno)**

|                                                                           |  |                                                                            |  |
|---------------------------------------------------------------------------|--|----------------------------------------------------------------------------|--|
| Fecha del egreso materno                                                  |  | Edad de la madre                                                           |  |
| dia mes año                                                               |  | dia mes año                                                                |  |
| <b>Estado de la madre</b>                                                 |  | <b>Estado del Recién Nacido</b>                                            |  |
| <input type="radio"/> Alta viva (a domicilio)                             |  | <input type="radio"/> Alta vivo (a domicilio)                              |  |
| <input type="radio"/> Muerta                                              |  | <input type="radio"/> Muerto                                               |  |
| <input type="radio"/> Traslada a otro hospital (UCI)                      |  | <input type="radio"/> Aloj. conjunto o cuidados intermedios                |  |
| <input type="radio"/> Traslada a otro hospital (no UCI)                   |  | <input type="radio"/> UCIN en este hospital                                |  |
| Si hubo traslado, especifique dónde                                       |  | <input type="radio"/> Traslado a otro hospital                             |  |
| Si hubo traslado, especifique dónde                                       |  | Si hubo traslado, especifique dónde                                        |  |
| Transfusión de sangre <input type="radio"/> no <input type="radio"/> si   |  | Estuvo internado en UCIN <input type="radio"/> no <input type="radio"/> si |  |
| Estuvo internada en UCI <input type="radio"/> no <input type="radio"/> si |  |                                                                            |  |

| 3 Completar sólo para madres trasladadas (al alta definitiva)                            |  | 4 Completar sólo para RN trasladados o internados (al alta definitiva) |  |
|------------------------------------------------------------------------------------------|--|------------------------------------------------------------------------|--|
| <b>Estado de la madre</b>                                                                |  | <b>Estado del RN</b>                                                   |  |
| <input type="radio"/> Alta viva (a domicilio)                                            |  | <input type="radio"/> Alta vivo (a domicilio)                          |  |
| <input type="radio"/> Muerta                                                             |  | <input type="radio"/> Muerto                                           |  |
| Fecha                                                                                    |  | Fecha                                                                  |  |
| dia mes año                                                                              |  | dia mes año                                                            |  |
| Continúa internado al 7º día de nacido <input type="radio"/> no <input type="radio"/> si |  |                                                                        |  |

Pegar etiqueta con número de control SIP

HCPESAVP-10/02 Descripción de códigos en el reverso CLP2003-01GL SIP OFR3.0.07/2004

NOMBRE

NUMERO  
IDENTID.

Para archivar  
en el hospital

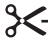

Para enviar  
al CLAP

**2 Completar para todos los partos (al egreso hospitalario materno)**

Fecha del egreso materno

día mes año

Edad de la madre

**Estado de la madre**

- Alta viva (a domicilio)
- Muerta
- Traslada a otro hospital (UCI)
- Traslada a otro hospital (no UCI)

Si hubo traslado, especifique dónde

Transfusión de sangre  no  si

Estuvo internada en UCI  no  si

**Estado del Recién Nacido**

- Alta vivo (a domicilio)
- Muerto
- Aloj. conjunto o cuidados intermedios
- UCIN en este hospital
- Traslado a otro hospital

Si hubo traslado, especifique dónde

Estuvo internado en UCIN  no  si

**Datos a obtener por el recolector de datos del Proyecto Guías**

**3 Completar sólo para madres trasladadas (al alta definitiva)**

**Estado de la madre**

- Alta viva (a domicilio)
- Muerta

**Fecha**

día mes año

**4 Completar sólo para RN trasladados o internados (al alta definitiva)**

**Estado del RN**

- Alta vivo (a domicilio)
- Muerto

**Fecha**

día mes año

Continúa internado al 7º día de nacido  no  si

Pegar etiqueta  
con número de control  
**ALTA 1**

Para archivar en el hospital

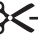

Para enviar al CLAP

NOMBRE

FECHA DE NACIMIENTO

día mes año

EDAD (años)

NUMERO IDENTID.

partos

PARTO  ABORTO

INICIO

- espontáneo
- inducido
- cesar. elect.

EDAD GEST. al parto

semanas días

|            |                            |                                 |                             |                                      |                                  |                          |                   |       |                               |                               |                            |
|------------|----------------------------|---------------------------------|-----------------------------|--------------------------------------|----------------------------------|--------------------------|-------------------|-------|-------------------------------|-------------------------------|----------------------------|
| NACIMIENTO | VIVO <input type="radio"/> | hora                            | min                         | día                                  | mes                              | año                      | MULTIPLE<br>orden | fetos | espont. <input type="radio"/> | cesárea <input type="radio"/> | otra <input type="radio"/> |
|            | MUERTO                     | anteparto <input type="radio"/> | parto <input type="radio"/> | ignora momento <input type="radio"/> | 0=único <input type="checkbox"/> | <input type="checkbox"/> |                   |       | forceps <input type="radio"/> | vacuum <input type="radio"/>  | <input type="radio"/>      |

PESO AL NACER

|                      |                      |                      |                      |                      |                      |   |
|----------------------|----------------------|----------------------|----------------------|----------------------|----------------------|---|
| <input type="text"/> | g |
|----------------------|----------------------|----------------------|----------------------|----------------------|----------------------|---|

EG CONFIABLE

|                      |                      |
|----------------------|----------------------|
| sem.                 | días                 |
| <input type="text"/> | <input type="text"/> |

APGAR

|                      |                      |
|----------------------|----------------------|
| 1 <sup>er</sup> min. | <input type="text"/> |
| 5 <sup>to</sup>      | <input type="text"/> |

ATENDIO médico enf./obst. auxil. estud./empir. otro

|                             |                       |                       |                       |                       |
|-----------------------------|-----------------------|-----------------------|-----------------------|-----------------------|
| PARTO <input type="radio"/> | <input type="radio"/> | <input type="radio"/> | <input type="radio"/> | <input type="radio"/> |
|-----------------------------|-----------------------|-----------------------|-----------------------|-----------------------|

### 1 Completar sólo para partos vaginales (luego del parto)

**Ocitocina para conducción del trabajo de parto**  
(hasta el nacimiento)

- No se usó
- Intramuscular
- Intravenosa

**Uterotónicos para manejo activo del alumbramiento**  
(desde el nacimiento hasta la expulsión de la placenta)

Medicación usada

- Ninguna
- Ocitocina
- Otros

Si se usó ocitocina:

Vía de administración

- Intramuscular
- Intravenosa

Dosis (UI)

|                      |                      |
|----------------------|----------------------|
| <input type="text"/> | <input type="text"/> |
|----------------------|----------------------|

**Uterotónicos en el Post Parto inmediato**

(desde la expulsión de la placenta hasta la salida de la mujer de la sala de partos)

- No se usaron
- Ocitocina
- Otros

**Episiotomía**

- no
- si

**Desgarro**

Grado

- |                       |                       |                       |                       |                       |
|-----------------------|-----------------------|-----------------------|-----------------------|-----------------------|
| no                    | 1                     | 2                     | 3                     | 4                     |
| <input type="radio"/> |

**Sutura por episiotomía o desgarro perineal**

- no
- si

**Placenta retenida**

extracción manual otros

- no
- 
- 

Pegar etiqueta con número de control  
**SIP**

HCPESAVP-10/02

CLP2003-01GL CLIN 1 OFR3.0.07/2004
