# Supplementary material
Source: PubMed Central journal article supplement (PMC7450538)
Supplement: NIHMS1552327-supplement-Measurement_Error.pdf [file NIHMS1552327-supplement-Measurement_Error.pdf]

Appendix Table 1. Descriptive statistics, SIP Uruguay, all live births only, limited to gestational ages based on last menstrual period or ultrasound.

|                                   | Complete data<br>(n=138205) | Implausible values<br>removed <sup>a</sup> (n=137,078) |
|-----------------------------------|-----------------------------|--------------------------------------------------------|
| Head circumference                |                             |                                                        |
| Mean (cm)                         | 34.6                        | 34.5                                                   |
| Median (cm)                       | 34.5                        | 34.5                                                   |
| Mode (cm)                         | 35.0                        | 35.0                                                   |
| Standard deviation (cm)           | 2.2                         | 1.7                                                    |
| IQR (cm)                          | 33.5-35.5                   | 33.5-35.5                                              |
| Range (cm)                        | 13-85                       | 23.5-45.4                                              |
| Recorded as cm (.0) (%)           | 74%                         | 74%                                                    |
| Recorded as half-cm (.5) (%)      | 25%                         | 25%                                                    |
| Recorded to mm (%)                | 1%                          | 1%                                                     |
| Gestational age                   |                             |                                                        |
| Recorded as weeks only (%)        | 60%                         | 60%                                                    |
| Recorded as weeks plus 0 days (%) | 30%                         | 30%                                                    |
| Recorded in days (%)              | 10%                         | 10%                                                    |

<sup>a</sup> Head circumference  $\pm 5$  SD of the mean

SIP, Systema Informatico Perinatal; HC, head circumference; IQR, interquartile range; SD, standard deviation

Appendix Figure 1. Head circumference by gestational week. Top, all data; bottom, implausible values removed.

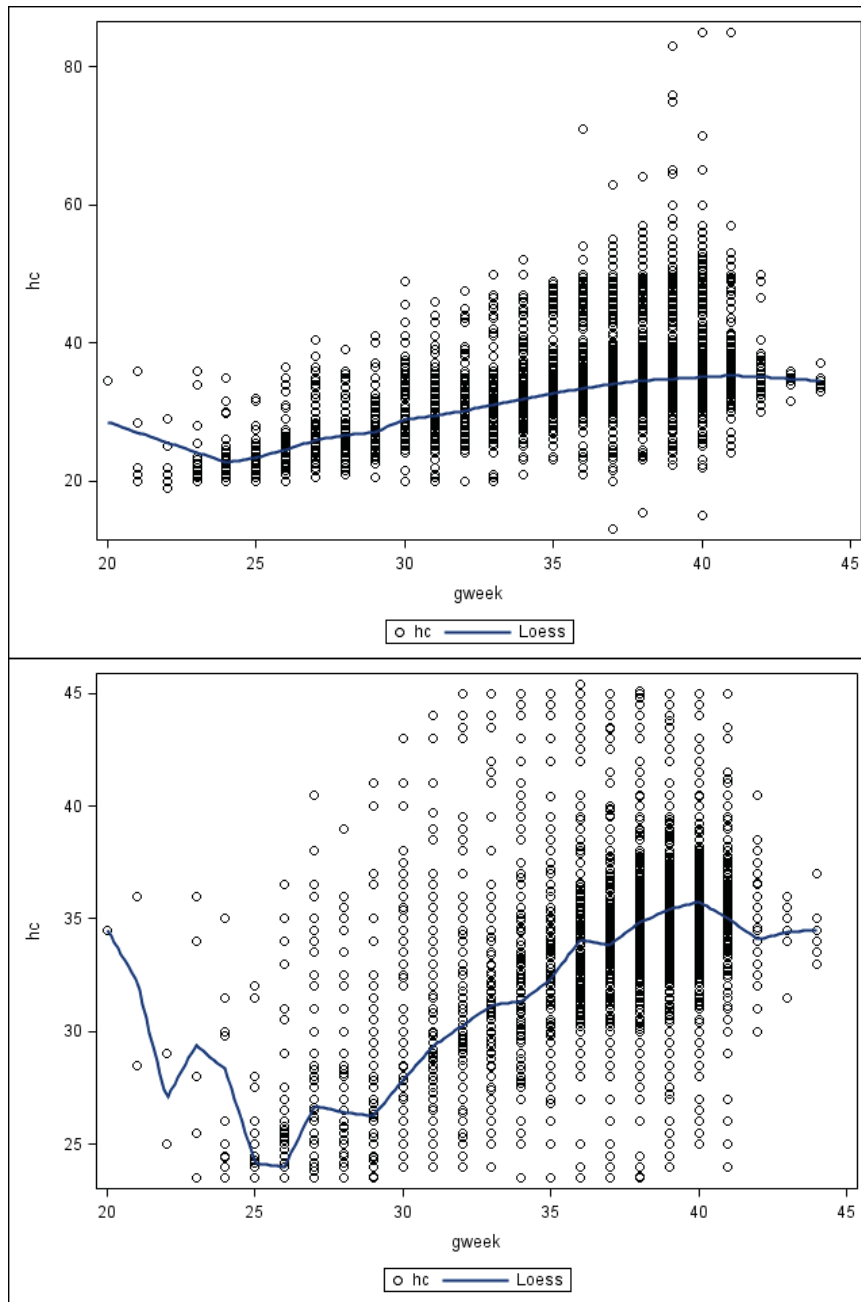

hc, head circumference
